# Supplementary material
Source: publisher figshare collection journal article supplement (https://frontiersin.figshare.com/ndownloader/files/24988865)
Supplement: Supplementary file [file 24988865]

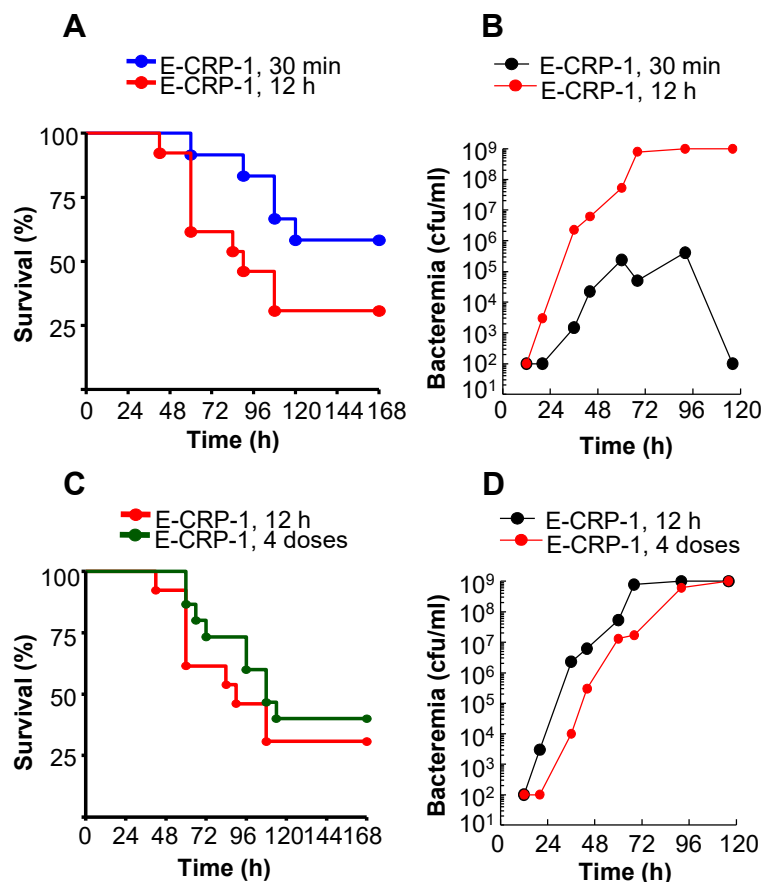

**Supplemental Figure 2:** E-CRP-1 was protective against late-stage infection regardless of the time of administration. The data shown in this figure are derived from **Figures 6-8**. **(A)** Survival curves. The  $p$  value for the difference between 30 min and 12 h survival curves was 0.09. **(B)** Median bacteremia in each group of mice shown in **A**. Statistical analysis for bacteremia was performed using the scatter plots shown in **Figures 6-7**. For 44-116 h, the differences in bacteremia between 30 min and 12 h groups were not statistically significant. **(C)** Survival curves. The  $p$  value for the difference between one dose and four doses survival curves was 0.41. **(D)** Median bacteremia in each group of mice shown in **C**. Statistical analysis for bacteremia was performed using the scatter plots shown in **Figures 7-8**. For 36-116 h, the differences in bacteremia between one dose and four doses groups were not statistically significant.
